# Supplementary material for: Combining airborne gas and aerosol measurements with HYSPLIT: a visualization tool for simultaneous evaluation of air mass history and back trajectory consistency
Source: Copernicus journal article supplement (doi:10.5194/amt-7-107-2014), 2014-01-14
Supplement: Supplementary file 1 [file Readme.pdf › Readme.pdf]

# Assimilating airborne gas and aerosol measurements into HYSPLIT: A visualization tool for simultaneous assessment of air mass history and back trajectory reliability

## Supplement

Adjust folder locations in all files as needed.

1) Run *mat2Hysplit.m*

- Use example data provided in *flight\_data.mat*
- *mat2Hysplit.m* calls *Hysplit\_text\_input.m* for additional information
- Creates text files for HYSPLIT input and a file called *trajinnumbers.txt* needed in step 5

2) Download *gdas1.aug07.w1* and *gdas1.aug07.w2* meteorological data at <ftp://arlftp.arlhq.noaa.gov/pub/archives/gdas1/> to process text files with HYSPLIT created with *mat2Hysplit.m* using *flight\_data.mat* - <http://ready.arl.noaa.gov/gdas1.php> provides temporal range of w1, w2, .. files

3) Open HYSPLIT and select all additional meteorological variables along the trajectory (Figs. 1 and 2) for **Hysplit2mat.m** (see step 5) to work properly

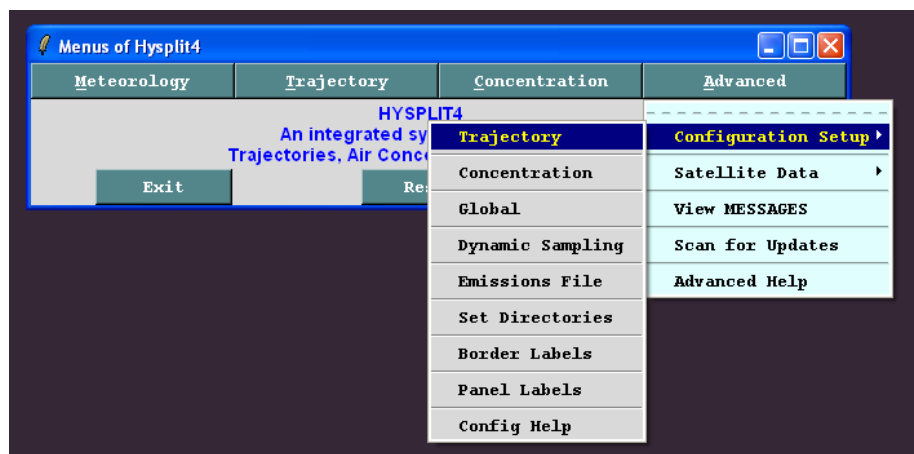

**Figure 1** – Select additional trajectory information

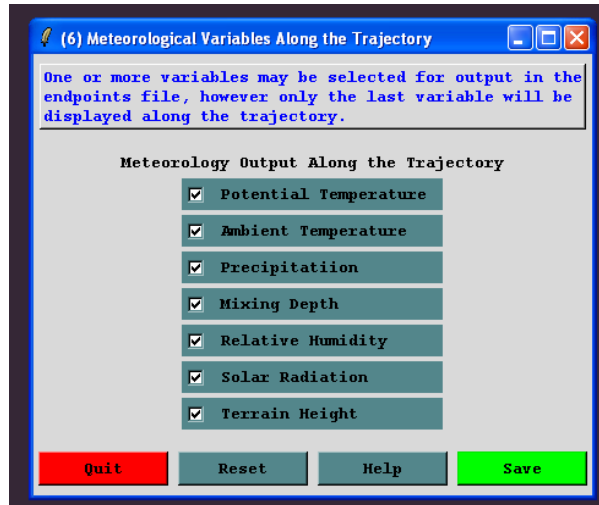

**Figure 2** – Select all data sets

- 4) Run *Hysplit.bat* to process text files with HYSPLIT automatically
  - Open *Hysplit.bat* with any text editor and change file locations of input text files, *CONTROL* (comes with HYSPLIT installation), and *hyts\_std.exe* (comes with HYSPLIT installation)
  - *Hysplit.bat* needs to be copied into the *\hysplit4\working* directory in order for it to work properly
  - Creates output text files including the complete trajectory information for use in step 5
- 5) Run *Hysplit2mat.m* for conversion to Matlab format – it creates the file *ExampleFlight.mat* attached here
- 6) Run *Example\_Trajectories.m* to create Figure 3

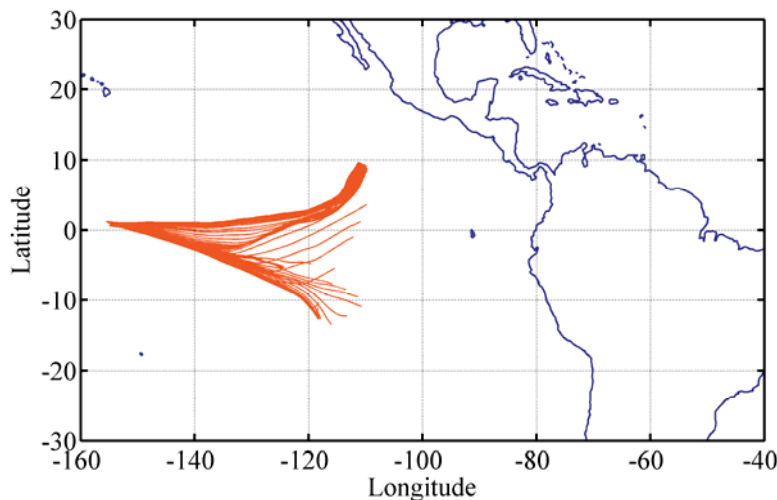

**Figure 3** – Example Trajectories
